# Supplementary material for: Analysis of Genetic Diversity and Population Structure of Cowpea (Vigna unguiculata (L.) Walp) Genotypes Using Single Nucleotide Polymorphism Markers
Source: MDPI journal article supplement (doi:10.3390/plants11243480), 2022-12-12
Supplement: s1 [file s1]

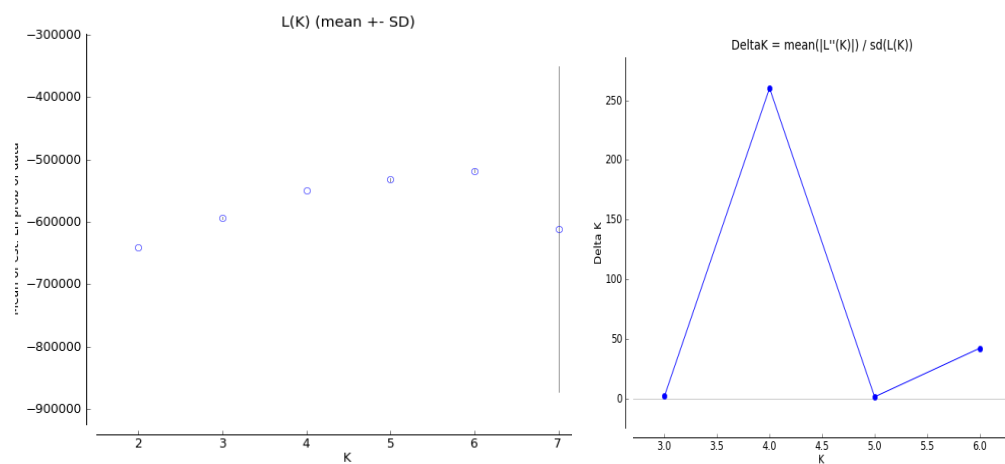

**Supplementary Figure S1.** Population structure analysis using a Bayesian-based approach. Estimation of hypothetical subpopulations using K-values showing the highest Delta k value was observed at the number of populations (K) = 4.
