# Supplementary material for: Analysis of Genetic Diversity and Population Structure of Cowpea (Vigna unguiculata (L.) Walp) Genotypes Using Single Nucleotide Polymorphism Markers
Source: MDPI journal article supplement (doi:10.3390/plants11243480), 2022-12-12
Supplement: s1 [file s1]

**Supplementary Table S1:** List of cowpea genotypes used in the study and their origin.

| Genotype code | Genotype Code | Accession name | Origin       | Growth habit | Seed shape | Seed coat color |
|---------------|---------------|----------------|--------------|--------------|------------|-----------------|
| G1            | Acc-Cowp2     | ARC002         | South Africa | Prostrate    | Kidney     | Red             |
| G2            | Acc-Cowp3     | ARC003         | South Africa | Prostrate    | Kidney     | Brown           |
| G3            | Acc-Cowp4     | ARC004         | South Africa | Prostrate    | Kidney     | Red             |
| G4            | Acc-Cowp5     | ARC005         | South Africa | Prostrate    | Rhomboid   | Black           |
| G5            | Acc-Cowp6     | ARC006         | South Africa | Prostrate    | Kidney     | Brown           |
| G6            | Acc-Cowp9     | ARC009         | South Africa | Semi-erect   | Rhomboid   | Cream           |
| G7            | Acc-Cowp10    | ARC010         | South Africa | Prostrate    | Rhomboid   | Purple          |
| G8            | Acc-Cowp11    | ARC011         | South Africa | Climbing     | Kidney     | Light brown     |
| G9            | Acc-Cowp12    | ARC012         | South Africa | Prostrate    | Rhomboid   | Brown           |
| G10           | Acc-Cowp13    | ARC013         | South Africa | Prostrate    | Kidney     | Brown           |
| G11           | Acc-Cowp14    | ARC014         | South Africa | Erect        | Ovoid      | Red             |
| G12           | Acc-Cowp15    | ARC015         | South Africa | Prostrate    | Ovoid      | Red             |
| G13           | Acc-Cowp16    | ARC016         | South Africa | Prostrate    | Rhomboid   | Black           |
| G14           | Acc-Cowp17    | ARC017         | South Africa | Erect        | Ovoid      | Cream           |
| G15           | Acc-Cowp18    | ARC018         | South Africa | Erect        | Rhomboid   | Red-speckled    |
| G16           | Acc-Cowp19    | ARC019         | South Africa | Erect        | Globose    | Light brown     |
| G17           | Acc-Cowp20    | ARC020         | South Africa | Erect        | Rhomboid   | Red             |
| G18           | Acc-Cowp21    | ARC021         | South Africa | Erect        | Kidney     | Cream           |
| G19           | Acc-Cowp22    | ARC022         | South Africa | Prostrate    | Rhomboid   | Brown           |
| G20           | Acc-Cowp23    | ARC023         | South Africa | Unknown      | Rhomboid   | Brown           |
| G21           | Acc-Cowp24    | ARC024         | South Africa | Climbing     | Rhomboid   | Black           |
| G22           | Acc-Cowp25    | ARC025         | South Africa | Climbing     | Rhomboid   | Red             |
| G23           | Acc-Cowp26    | ARC026         | South Africa | Semi-erect   | Kidney     | Grey-speckled   |
| G24           | Acc-Cowp27    | ARC027         | South Africa | Semi-erect   | Kidney     | Red-speckled    |
| G25           | Acc-Cowp28    | ARC028         | South Africa | Prostrate    | Kidney     | Red             |
| G26           | Acc-Cowp29    | ARC029         | South Africa | Prostrate    | Kidney     | Brown           |
| G27           | Acc-Cowp30    | ARC030         | South Africa | Semi-erect   | Globose    | Black           |
| G28           | Acc-Cowp31    | ARC031         | South Africa | Prostrate    | Globose    | Cream           |
| G29           | Acc-Cowp32    | ARC032         | South Africa | Prostrate    | Kidney     | Red             |
| G30           | Acc-Cowp33    | ARC033         | South Africa | Prostrate    | Kidney     | Red             |
| G31           | Acc-Cowp34    | ARC034         | South Africa | Semi-erect   | Rhomboid   | Light red       |
| G32           | Acc-Cowp35    | ARC035         | South Africa | Climbing     | Kidney     | Light brown     |
| G33           | Acc-Cowp36    | ARC036         | South Africa | Climbing     | Kidney     | Light brown     |
| G34           | Acc-Cowp37    | ARC037         | South Africa | Prostrate    | Kidney     | Light brown     |
| G35           | Acc-Cowp38    | ARC038         | South Africa | Climbing     | Globose    | Black           |
| G36           | Acc-Cowp39    | ARC039         | South Africa | Semi-erect   | Kidney     | Red             |
| G37           | Acc-Cowp40    | ARC040         | South Africa | Semi-erect   | Kidney     | Black           |
| G38           | Acc-Cowp41    | ARC041         | South Africa | Erect        | Ovoid      | Cream           |
| G39           | Acc-Cowp42    | ARC042         | South Africa | Unknown      | Kidney     | Brown           |

|            |            |                |              |            |          |             |
|------------|------------|----------------|--------------|------------|----------|-------------|
| <b>G40</b> | Acc-Cowp43 | ARC043         | South Africa | Semi-erect | Kidney   | Brown       |
| <b>G41</b> | Acc-Cowp44 | ARC044         | South Africa | Erect      | Kidney   | Light brown |
| <b>G42</b> | Acc-Cowp46 | ARC046         | South Africa | Erect      | Kidney   | White       |
| <b>G43</b> | Acc-Cowp47 | ARC047         | South Africa | Erect      | Rhomboid | Brown       |
| <b>G44</b> | Acc-Cowp48 | ARC048         | South Africa | Prostrate  | Kidney   | Cream       |
| <b>G45</b> | Acc-Cowp49 | ARC049         | South Africa | Prostrate  | Rhomboid | Brown       |
| <b>G46</b> | Acc-Cowp50 | ARC050         | South Africa | Prostrate  | Kidney   | Black       |
| <b>G47</b> | Acc-Cowp74 | 98K-5301       | South Africa | Erect      | Kidney   | White       |
| <b>G48</b> | Acc-Cowp64 | Glenda         | South Africa | Semi-erect | Kidney   | Brown       |
| <b>G49</b> | Acc-Cowp70 | TVU13953       | South Africa | Prostrate  | Kidney   | Cream       |
| <b>G50</b> | Acc-Cowp62 | VegCowDakCream | South Africa | Erect      | Kidney   | White       |
| <b>G51</b> | Acc-Cowp51 | CH 14          | South Africa | Unknown    | Kidney   | Brown       |
| <b>G52</b> | Acc-Cowp53 | BENSOGLA       | South Africa | Unknown    | Rhomboid | Brown       |
| <b>G53</b> | Acc-Cowp52 | IT845-2246     | Nigeria      | Unknown    | Rhomboid | Brown       |
| <b>G54</b> | Acc-Cowp54 | TVU 11424      | Nigeria      | Unknown    | Kidney   | Brown       |
| <b>G55</b> | Acc-Cowp55 | MAKATINI       | South Africa | Unknown    | Rhomboid | Brown       |
| <b>G56</b> | Acc-Cowp56 | VULI           | Tanzania     | Unknown    | Kidney   | Brown       |
| <b>G57</b> | Acc-Cowp57 | PAN 311        | South Africa | Unknown    | Kidney   | Brown       |
| <b>G58</b> | Acc-Cowp58 | NGOJI          | South Africa | Unknown    | Kidney   | Brown       |
| <b>G59</b> | Acc-Cowp59 | ENBO BUFF      | South Africa | Semi-erect | Rhomboid | Brown       |
| <b>G60</b> | Acc-Cowp60 | IT93K 1294     | Nigeria      | Erect      | Rhomboid | Purple      |
| <b>G61</b> | Acc-Cowp61 | OUKAWA         | South Africa | Prostrate  | Kidney   | Cream       |
| <b>G62</b> | Acc-Cowp63 | IT90K-76       | Nigeria      | Unknown    | Rhomboid | Brown       |
| <b>G63</b> | Acc-Cowp65 | IT96D-602      | Nigeria      | Erect      | Ovoid    | Cream       |
| <b>G64</b> | Acc-Cowp66 | Bechuana White | South Africa | Unknown    | Rhomboid | Brown       |
| <b>G65</b> | Acc-Cowp67 | 5431           | South Africa | Erect      | Rhomboid | Cream       |
| <b>G66</b> | Acc-Cowp68 | IT90K-59       | Nigeria      | Unknown    | Rhomboid | Brown       |
| <b>G67</b> | Acc-Cowp69 | FAHARI         | Tanzania     | Semi-erect | Kidney   | Brown       |
| <b>G68</b> | Acc-Cowp71 | TVU 6345       | Nigeria      | Semi-erect | Crowder  | Brown       |
| <b>G69</b> | Acc-Cowp72 | ENCORE         | South Africa | Unknown    | Kidney   | Brown       |
| <b>G70</b> | Acc-Cowp73 | TVU 12637      | Nigeria      | Unknown    | Kidney   | Black       |
| <b>G71</b> | Acc-Cowp75 | IT00K 1217     | Nigeria      | Unknown    | Rhomboid | White       |
| <b>G72</b> | Acc-Cowp76 | Veg cowpea 1   | South Africa | Semi-erect | Kidney   | Purple      |
| <b>G73</b> | Acc-Cowp77 | Veg cowpea 2   | South Africa | Semi-erect | Kidney   | White       |
| <b>G74</b> | Acc-Cowp78 | Veg cowpea 3   | South Africa | Erect      | Kidney   | White       |
| <b>G75</b> | Acc-Cowp79 | MA1            | South Africa | Erect      | Rhomboid | Purple      |
| <b>G76</b> | Acc-Cowp80 | IT89U-412      | Nigeria      | Unknown    | Kidney   | Black       |
| <b>G77</b> | Acc-Cowp81 | M346           | South Africa | Erect      | Rhomboid | Purple      |
| <b>G78</b> | Acc-Cowp82 | Ukaluleni      | South Africa | Prostate   | Kidney   | Brown       |
| <b>G79</b> | Acc-Cowp83 | IT89D-349      | Nigeria      | Erect      | Kidney   | Brown       |
| <b>G80</b> | Acc-Cowp85 | Mpenbeni       | South Africa | Prostrate  | Rhomboid | Cream       |
| <b>G81</b> | Acc-Cowp86 | 2460           | South Africa | Prostrate  | Kidney   | Cream       |
| <b>G82</b> | Acc-Cowp87 | Vigna Onb      | South Africa | Prostrate  | Kidney   | Purple      |

|            |            |                 |              |           |          |        |
|------------|------------|-----------------|--------------|-----------|----------|--------|
| <b>G83</b> | Acc-Cowp88 | MA2             | South Africa | Erect     | Rhomboid | White  |
| <b>G84</b> | Acc-Cowp89 | Meter bean piet | South Africa | Prostrate | Kidney   | Cream  |
| <b>G85</b> | Acc-Cowp91 | Chappy          | South Africa | Prostrate | Kidney   | Cream  |
| <b>G86</b> | Acc-Cowp92 | M217            | South Africa | Erect     | Rhomboid | Purple |
| <b>G87</b> | Acc-Cowp93 | Tatro mix       | Kenya        | Prostrate | Rhomboid | Brown  |
| <b>G88</b> | Acc-Cowp94 | TV778           | Nigeria      | Erect     | Kidney   | Cream  |
| <b>G89</b> | Acc-Cowp7  | New Line 2      | South Africa | Unknown   | Kidney   | Cream  |
| <b>G90</b> | Acc-Cowp1  | New Line 1      | South Africa | Unknown   | Kidney   | Brown  |

Note: VegCowDakCream = Vegetable cowpea Dakama Cream
